# Supplementary material for: N-Hydroxy and N-acyloxy peptides: synthesis and chemical modifications
Source: Royal Society of Chemistry journal article supplement (doi:10.1039/b606677a), 2006-01-01
Supplement: b606677a.pdf [file b606677a.pdf]

## ***N*-hydroxy and *N*-acyloxy peptides: synthesis and chemical modifications**

**James Lawrence, Laure Cointeaux, Pascal Maire, Yannick Vallée\***

**and Véronique Blandin\***

*Grenoble Universités,*

*LEDSS, UMR CNRS/UJF 5616, ICMG, FR-2607, Université Joseph Fourier Grenoble I,*

*BP 53, 38041 Grenoble Cedex 9, France.*

*Fax: +33 476 635 983; Tel: +33 476 514 803; E-mail: Veronique.Blandin@ujf-grenoble.fr*

### **Contents**

|                                                               |   |
|---------------------------------------------------------------|---|
| <b>Synthesis of <math>\alpha</math>-keto-amides 1</b>         | 1 |
| <b>Synthesis of <math>\alpha</math>-hydroxyimino-amides 2</b> | 3 |
| <b>Assignment of configuration for compounds 3</b>            | 4 |
| <b>References</b>                                             | 4 |

### **Synthesis of $\alpha$ -keto-amides 1**

#### **(2*S*)-3-Methyl-2-(3-methyl-2-oxo-butyrylamino)-butyric acid benzyl ester (1a)**

A solution of 3-methyl-2-oxo-butyric acid (2.40 g, 20.1 mmol; prepared from diethyl oxalate and isopropylmagnesium chloride)<sup>1</sup> in CH<sub>2</sub>Cl<sub>2</sub> (27 mL) was cooled to 0°C and  $\alpha,\alpha$ -dichloromethylmethylether (1.83 mL, 2.32 g, 20.1 mmol) was slowly added<sup>2</sup> The solution was stirred for 15 minutes at 0°C, 45 minutes at room temperature and 1.5h at 50°C. The resulting solution of acyl chloride was cooled to room temperature, then added at 0°C to a solution of L-valine benzylester *p*-toluenesulfonate salt (7.62 g, 20.1 mmol) and NMM (*N*-methylmorpholine; 4.84 mL, 4.45 g, 44 mmol) in CH<sub>2</sub>Cl<sub>2</sub> (100 mL). The mixture was stirred for 15 minutes at 0°C, then overnight at room temperature. The solution was washed with brine and the organic layer dried over Na<sub>2</sub>SO<sub>4</sub>. Removal of the solvent under reduced pressure followed by purification by flash chromatography (Silica gel, CH<sub>2</sub>Cl<sub>2</sub>) of the oily residue gave **1a** (4.16 g, 13.6 mmol, 68%) as a colourless oil. *R<sub>f</sub>* 0.34 (CH<sub>2</sub>Cl<sub>2</sub>).  $[\alpha]_D^{25} +2.1^\circ$  (*c* 2.79 in CHCl<sub>3</sub>).  $\delta_H$  (300 MHz; CDCl<sub>3</sub>) 7.48-7.27 (6H, m, CH<sub>ar</sub>, NH), 5.18 (2H, ABq, *J* 12.2,  $\delta_A$ - $\delta_B$  14.9, CH<sub>2</sub>-OBn), 4.54 (1H, dd, *J* 4.9 and 9.2, CH <sub>$\alpha$</sub>  Val), 3.58 (1H, h, *J* 6.9, CH <sup>1</sup>Pr), 2.33-2.16 (1H, m, CH<sub>iPr</sub> Val), 1.16 (3H, d, *J* 6.9, CH<sub>3</sub> <sup>1</sup>Pr), 1.13 (3H, d, *J* 6.9, CH<sub>3</sub> <sup>1</sup>Pr), 0.93 (3H, d, *J* 6.9, CH<sub>3</sub> Val), 0.89 (3H, d, *J* 6.9, CH<sub>3</sub> Val).  $\delta_C$  (75 MHz; CDCl<sub>3</sub>) 201.7, 171.0, 159.9 (C=O), 135.3 (C<sub>ar</sub>), 128.8, 128.7, 128.6 (CH<sub>ar</sub>), 67.4 (CH<sub>2</sub>-OBn), 57.4 (CH <sub>$\alpha$</sub>  Val), 34.4 (CH <sup>1</sup>Pr), 31.6 (CH<sub>iPr</sub> Val), 19.2, 17.9, 17.8, 17.7 (CH<sub>3</sub>). IR: 3404, 2969, 1742,

1689, 1514, 1147, 752, 698. LRMS (ESI +)  $m/z$ : 306.1 (M+H)<sup>+</sup>, 328.1 (M+Na)<sup>+</sup>, 344.0 (M+K)<sup>+</sup>. Anal.: found, C66.83; H7.72; N4.60. C<sub>17</sub>H<sub>23</sub>NO<sub>4</sub> requires C66.86; H7.59; N4.59%.

### (2S)-3-Methyl-2-(2-oxo-propionylamino)-butyric acid ethyl ester (1b)

To a solution of L-valine ethyl ester hydrochloride (2.63 g, 14.5 mmol) in CH<sub>2</sub>Cl<sub>2</sub> (23 mL) at 0°C was added NMM (3.5 mL, 31.8 mmol) followed by a solution of 2-oxo-propanoyl chloride<sup>3</sup> (1.70 g, 15.9 mmol) in CH<sub>2</sub>Cl<sub>2</sub> (11 mL). An orange solid precipitated and the mixture was stirred at room temperature overnight. The precipitate was removed by filtration over Celite® 535 and the solvent was evaporated under reduced pressure. Purification of the orange oil by flash chromatography (Silica gel, CH<sub>2</sub>Cl<sub>2</sub>-MeOH 97:3) gave **1b** as a yellow oil (2.73 g, 12.7 mmol, 88%).  $R_f$  0.91 (CH<sub>2</sub>Cl<sub>2</sub>-MeOH 95 : 5).  $[\alpha]_D^{25}$  -1.88 (*c* 3.67 in CHCl<sub>3</sub>).  $\delta_H$  (200 MHz; CDCl<sub>3</sub>) 7.40 (1H, br s, NH), 4.46 (1H, dd, *J* 4.9 and 9.2, CH<sub>a</sub> Val), 4.22 (2H, q, *J* 7.1, CH<sub>2</sub> -OEt), 2.48 (3H, s, CH<sub>3</sub>CO), 2.32-2.16 (1H, m, CH<sub>iPr</sub> Val), 1.29 (3H, t, *J* 7.1, CH<sub>3</sub> -OEt), 0.96 (3H, d, *J* 6.8, CH<sub>3</sub> Val), 0.94 (3H, d, *J* 6.8, CH<sub>3</sub> Val).  $\delta_C$  (75 MHz; CDCl<sub>3</sub>) 196.4 (CH<sub>3</sub>C=O), 170.9 (NHC=O), 160.1 (OC=O), 61.6 (CH<sub>2</sub> -OEt), 57.4 (CH<sub>a</sub> Val), 31.5 (CH<sub>iPr</sub> Val), 24.5 (CH<sub>3</sub>CO), 19.1, 17.8 (CH<sub>3</sub> Val), 14.3 (CH<sub>3</sub> -OEt). IR: 3397, 2962, 1741, 1682, 1505, 1196, 1019. HRMS (ESI +)  $m/z$ : found, 238.1055; C<sub>10</sub>H<sub>17</sub>NO<sub>4</sub>Na requires 238.1055.

### (2S)-4-Methyl-2-(2-oxo-propionylamino)-pentanoic acid ethyl ester (1c)

The title compound was prepared as described for **1b** using L-leucine ethyl ester hydrochloride (4.65 g, 23.7 mmol) and was obtained as a pale yellow oil (4.73 g, 20.6 mmol, 87%).  $R_f$  0.76 (CH<sub>2</sub>Cl<sub>2</sub>-MeOH 97:3).  $\delta_H$  (200 MHz; CDCl<sub>3</sub>) 7.39 (1H, d, *J* 8.9, NH), 4.62-4.51 (1H, m, CH<sub>a</sub> Leu), 4.17 (2H, q, *J* 7.2, CH<sub>2</sub> -OEt), 2.47 (3H, s, CH<sub>3</sub>CO), 1.70-1.66 (3H, m, CH<sub>iBu</sub> Leu, CH<sub>2</sub> Leu), 1.29 (3H, t, *J* 7.2, CH<sub>3</sub> -OEt), 0.95 (6H, d, *J* 6.5, CH<sub>3</sub> Leu).  $\delta_C$  (75 MHz; CDCl<sub>3</sub>) 196.3 (CH<sub>3</sub>C=O), 171.8 (NHC=O), 159.8 (OC=O), 61.5 (CH<sub>2</sub> -OEt), 50.8 (CH<sub>a</sub> Leu), 41.3 (CH<sub>2</sub> Leu), 24.8 (CH<sub>iBu</sub> Leu), 24.3 (CH<sub>3</sub>CO), 22.7, 21.7 (CH<sub>3</sub> Leu), 14.1 (CH<sub>3</sub> -OEt).

### (2S)-2-(3-Methyl-2-oxo-butrylamino)-3-phenyl-propionic acid benzyl ester (1d)

The title compound was prepared as described for **1a** using L-phenylalanine benzylester *p*-toluenesulfonate salt (6.49 g, 15.2 mmol) and was obtained as a colourless oil (4.16 g, 13.7 mmol, 50%).  $R_f$  0.61 (CH<sub>2</sub>Cl<sub>2</sub>).  $[\alpha]_D^{25}$  -0.9° (*c* 1.14 in CHCl<sub>3</sub>).  $\delta_H$  (200 MHz; CDCl<sub>3</sub>)  $\delta$  7.28-7.21 (9H, m, CH<sub>ar</sub>), 7.02 (2H, m, CH<sub>ar</sub>, NH), 5.15 (2H, ABq, *J* 12.0,  $\delta_A$ - $\delta_B$  8.0, CH<sub>2</sub>-OBn), 4.87 (1H, dt, *J* 6.2 and 8.2, CH<sub>α</sub> Phe), 3.52 (1H, h, *J* 6.9, CH<sup>iPr</sup>), 3.14 (2H, ABX, <sup>3</sup>*J* 6.2, <sup>2</sup>*J* 13.9,  $\delta_A$ - $\delta_B$  12.3, CH<sub>2</sub> Phe), 1.10 (3H, d, *J* 7.2, CH<sub>3</sub>), 1.09 (3H, d, *J* 6.9, CH<sub>3</sub>).  $\delta_C$  (75 MHz; CDCl<sub>3</sub>) 201.5, 170.6, 159.5 (C=O), 135.4, 135.1 (C<sub>ar</sub>), 129.4, 128.9, 128.8 (2 peaks), 128.7, 127.4 (CH<sub>ar</sub>), 67.6 (CH<sub>2</sub> -OBn), 53.4 (CH<sub>α</sub> Phe), 38.1 (CH<sub>2</sub> Phe), 34.3 (CH<sub>iPr</sub>), 17.8, 17.7 (CH<sub>3</sub>). IR: 3394, 2969, 1744, 1688, 1519, 1175. LRMS (DCI)  $m/z$ : 354.1 (M+H)<sup>+</sup>, 371.8 (M+NH<sub>4</sub>)<sup>+</sup>. HRMS (ESI +)  $m/z$ : found, 376.1523; C<sub>21</sub>H<sub>23</sub>NO<sub>4</sub>Na requires 376.1525.

### (2S,3S)-3-Methyl-2-(3-methyl-2-oxo-butrylamino)-pentanoic acid benzyl ester (1e)

The title compound was prepared as described for **1a** using L-isoleucine benzylester *p*-toluenesulfonate salt (7.87 g, 20.1 mmol) and was obtained as a slightly yellow oil (2.11 g, 6.6 mmol, 33%).  $R_f$  0.56 (CH<sub>2</sub>Cl<sub>2</sub>).  $[\alpha]_D^{25}$  +3.6° (*c* 2.94 in CHCl<sub>3</sub>).  $\delta_H$  (300 MHz; CDCl<sub>3</sub>) 7.40-7.25 (6H, m, CH<sub>ar</sub>, NH), 5.18 (2H, ABq, *J* 12.2,  $\delta_A$ - $\delta_B$  18.5, CH<sub>2</sub> -OBn), 4.58 (1H, dd, *J* 4.9 and 9.1, CH<sub>α</sub> Ile), 3.55 (1H, h, *J* 6.9, CH<sup>iPr</sup>), 2.00-1.95 (1H, m, CH<sub>sBu</sub> Ile), 1.45-1.30 (1H, m, CHH Ile), 1.25-1.05 (1H, m, CHH Ile), 1.14 (3H, d, *J* 6.9, CH<sub>3</sub> <sup>iPr</sup>), 1.13 (3H, d, *J* 6.9, CH<sub>3</sub> <sup>iPr</sup>), 0.90 (3H, d, *J* 7.0, CH<sub>3</sub> Ile), 0.88 (3H, t, *J* 7.5, CH<sub>3</sub> Ile).  $\delta_C$  (75 MHz; CDCl<sub>3</sub>) 201.8, 171.0, 159.8 (C=O), 135.4 (C<sub>ar</sub>), 128.8, 128.7, 128.6 (CH<sub>ar</sub>), 67.4 (CH<sub>2</sub> -OBn), 56.8 (CH<sub>α</sub> Ile), 38.2 (CH<sup>iPr</sup>), 34.4 (CH<sub>sBu</sub> Ile), 25.2 (CH<sub>2</sub> Ile), 17.9, 17.8 (CH<sub>3</sub> <sup>iPr</sup>), 15.7, 11.7 (CH<sub>3</sub> Ile). IR: 3399, 2970, 1740, 1720, 1685, 1516, 1146, 911, 734. LRMS (DCI)  $m/z$ : 320.2 (M+H)<sup>+</sup>, 336.7 (M+NH<sub>4</sub>)<sup>+</sup>. HRMS (ESI +)  $m/z$ : found, 342.1677; C<sub>18</sub>H<sub>25</sub>NO<sub>4</sub>Na requires 342.1681.

## Synthesis of $\alpha$ -hydroxyimino-amides 2

### (2S)-2-(2-Hydroxyimino-3-methyl-butyrylamino)-3-methyl-butyric acid benzyl ester (2a)

To a solution of **1a** (1.93 g, 6.3 mmol) in THF (30 mL) was added hydroxylamine hydrochloride (0.91 g, 13.1 mmol) and NaOAc $\cdot$ 3H<sub>2</sub>O (1.23 g, 9.0 mmol). The mixture was stirred for 18h at reflux. The suspension was then filtered and the solvent evaporated under reduced pressure. Flash chromatography (Silica gel, CH<sub>2</sub>Cl<sub>2</sub>) gave **2a** (1.80 g, 5.6 mmol, 89%) as a colourless oil.  $R_f$  0.26 (CH<sub>2</sub>Cl<sub>2</sub>).  $[\alpha]_D^{25} +4.1^\circ$  (*c* 2.99 in CHCl<sub>3</sub>).  $\delta_H$  (300 MHz; CDCl<sub>3</sub>) 7.50-7.23 (5H, m, CH<sub>ar</sub>), 7.17 (1H, d, *J* 8.9, NH), 5.19 (2H, ABq, *J* 12.2,  $\delta_A$ - $\delta_B$  25.4, CH<sub>2</sub>-OBn), 4.63 (1H, dd, *J* 4.9 and 8.9, CH $_{\alpha}$  Val), 3.45 (1H, h, *J* 7.0, CH<sup>i</sup>Pr), 2.30-2.15 (1H, m, CH<sub>iPr</sub> Val), 1.26 (3H, d, *J* 7.0, CH<sub>3</sub><sup>i</sup>Pr), 1.24 (3H, d, *J* 7.1, CH<sub>3</sub><sup>i</sup>Pr), 0.93 (3H, d, *J* 6.9, CH<sub>3</sub> Val), 0.88 (3H, d, *J* 6.9, CH<sub>3</sub> Val).  $\delta_C$  (75 MHz; CDCl<sub>3</sub>) 172.7, 163.8 (C=O), 159.1 (C=N), 135.4 (C<sub>ar</sub>), 128.8, 128.7, 128.6 (CH<sub>ar</sub>), 67.5 (CH<sub>2</sub>-OBn), 57.2 (CH $_{\alpha}$  Val), 31.5 (CH<sup>i</sup>Pr), 25.6 (CH<sub>iPr</sub> Val), 19.2, 18.7, 18.5, 18.0 (CH<sub>3</sub>). IR: 3333, 2966, 1739, 1659, 1520, 1194, 1003, 698. LRMS (DCI) *m/z*: 321.0 (M+H)<sup>+</sup>, 337.7 (M+NH<sub>4</sub>)<sup>+</sup>. HRMS (ESI +) *m/z*: found, 343.1640; C<sub>17</sub>H<sub>24</sub>N<sub>2</sub>O<sub>4</sub>Na requires 343.1634.

### (2S)-2-(2-Hydroxyimino-propionylamino)-3-methyl-butyric acid ethyl ester (2b)

A solution of **1b** (3.53 g, 16.4 mmol), hydroxylamine hydrochloride (1.25 g, 18.0 mmol) and triethylamine (5 mL, 36.1 mmol) in EtOH (15 mL) was refluxed for 1.5h. The mixture was cooled to room temperature and the solvent was evaporated under reduced pressure. The orange oil was purified by flash chromatography (silica gel, pentane-EtOAc 2:1) to give **2b** (2.96 g, 9.5 mmol, 78%) as a colourless oil.  $R_f$  0.63 (CH<sub>2</sub>Cl<sub>2</sub>-MeOH 95:5).  $[\alpha]_D^{25} +14.7$  (*c* 2.60 in CHCl<sub>3</sub>).  $\delta_H$  (200 MHz; CDCl<sub>3</sub>) 9.94 (1H, br s, NOH), 7.46 (1H, d, *J* 9.2, NH), 4.59 (1H, dd, *J* 5.3 and 9.2, CH<sub>a</sub> Val), 4.35-4.15 (2H, m, CH<sub>2</sub>-OEt), 2.35-2.10 (1H, m, CH<sub>iPr</sub> Val), 2.08 (3H, s, CH<sub>3</sub>C=N), 1.31 (3H, t, *J* 7.0, CH<sub>3</sub>-OEt), 0.98 (3H, d, *J* 6.9, CH<sub>3</sub> Val), 0.96 (3H, d, *J* 6.9, CH<sub>3</sub> Val).  $\delta_C$  (75 MHz; CDCl<sub>3</sub>) 173.1, 164.0 (C=O), 151.9 (C=N), 61.8 (CH<sub>2</sub>-OEt), 57.4 (CH<sub>a</sub> Val), 31.3 (CH<sub>iPr</sub> Val), 19.2, 18.1 (CH<sub>3</sub> Val), 14.3 (CH<sub>3</sub>-OEt), 9.5 (CH<sub>3</sub>C=N). IR: 3304, 2965, 1736, 1663, 1520, 1186, 1019, 719. HRMS (ESI +) *m/z*: found, 253.1167; C<sub>10</sub>H<sub>18</sub>N<sub>2</sub>O<sub>4</sub>Na requires 253.1164.

### (2S)-2-(2-Hydroxyimino-propionylamino)-4-methyl-pentanoic acid ethyl ester (2c)

The title compound was prepared as described for **2b** using **1c** (3.25 g, 14.2 mmol). Removal of the solvent under reduced pressure gave a yellow/brown solid, which was dissolved in CH<sub>2</sub>Cl<sub>2</sub>-MeOH 90:10 and filtered through a 10cm plug of Silica gel. Crystallization from CH<sub>2</sub>Cl<sub>2</sub> gave **2c** (2.99 g, 12.2 mmol, 86%) as white needles. Mp 192°C.  $R_f$  0.50 (CH<sub>2</sub>Cl<sub>2</sub>-MeOH 95:5).  $[\alpha]_D^{25} -12.6$  (*c* 2.90 in CHCl<sub>3</sub>).  $\delta_H$  (200 MHz; CDCl<sub>3</sub>) 9.70 (1H, br s, NOH), 7.51 (1H, d, *J* 8.6, NH), 4.74-4.62 (1H, m, CH<sub>a</sub> Leu), 4.23 (2H, q, *J* 7.2, CH<sub>2</sub>-OEt), 2.07 (3H, s, CH<sub>3</sub>C=N), 1.74-1.52 (3H, m, CH<sub>iBu</sub> Leu, CH<sub>2</sub> Leu), 1.30 (3H, t, *J* 7.2, CH<sub>3</sub>-OEt), 0.94 (6H, d, *J* 6.2, CH<sub>3</sub> Leu).  $\delta_C$  (75 MHz; CDCl<sub>3</sub>) 174.9, 164.1 (C=O), 151.8 (C=N), 62.1 (CH<sub>2</sub>-OEt), 51.0 (CH<sub>a</sub> Leu), 41.3 (CH<sub>2</sub> Leu), 25.1 (CH<sub>iBu</sub> Leu), 22.9, 21.9 (CH<sub>3</sub> Leu), 14.2 (CH<sub>3</sub>-OEt), 9.6 (CH<sub>3</sub>C=N). IR: 3354, 3266, 2965, 1691, 1529, 1303, 1018, 724. LRMS (DCI) *m/z*: 245.0 (M+H)<sup>+</sup>. HRMS (ESI +) *m/z*: found, 267.1322; C<sub>11</sub>H<sub>20</sub>N<sub>2</sub>O<sub>4</sub>Na requires 267.1321.

### (2S)-2-(2-Hydroxyimino-3-methyl-butyrylamino)-3-phenyl-propionic acid benzylester (2d)

The title compound was prepared as described for **2a** using **1d** (2.48 g, 7.3 mmol) and, after flash chromatography (Silica gel, pentane-EtOAc 4:1), was obtained as a colourless oil (2.30 g, 6.2 mmol, 89%).  $R_f$  0.16 (CH<sub>2</sub>Cl<sub>2</sub>).  $[\alpha]_D^{25} -0.9^\circ$  (*c* 1.03 in CHCl<sub>3</sub>).  $\delta_H$  (300 MHz; CDCl<sub>3</sub>) 7.64 (s, 1H, NOH), 7.37-7.17 (m, 11H, CH<sub>ar</sub>, NH), 5.13 (2H, ABq, *J* 12.3,  $\delta_A$ - $\delta_B$  15.9, CH<sub>2</sub>-OBn), 4.92 (1H, dt, *J* 4.1 and 6.1, CH $_{\alpha}$  Phe), 3.44 (1H, h, *J* 7.1, CH<sup>i</sup>Pr), 3.11 (2H, ABX, <sup>3</sup>*J* 5.7, <sup>2</sup>*J* 13.5,  $\delta_A$ - $\delta_B$  13.6, CH<sub>2</sub> Phe), 1.23 (3H, d, *J* 7.1, CH<sub>3</sub>), 1.22 (3H, d, *J* 7.1, CH<sub>3</sub>).  $\delta_C$  (75 MHz; CDCl<sub>3</sub>) 171.9, 163.5 (C=O), 158.5 (C=N), 135.8, 135.1 (C<sub>ar</sub>), 129.4, 128.6 (2 peaks), 127.2 (CH<sub>ar</sub>), 67.5 (CH<sub>2</sub>-OBn), 53.4 (CH $_{\alpha}$

Phe), 38.1 (CH<sub>2</sub> Phe), 25.5 (CH<sup>i</sup>Pr), 18.5 (CH<sub>3</sub>). IR: 3330, 2965, 1741, 1660, 1516, 1192, 1003, 740, 699. LRMS (DCI) *m/z*: 368.9 (M+H)<sup>+</sup>, 386.1 (M+NH<sub>4</sub>)<sup>+</sup>. HRMS (ESI +): found, 391.1634; C<sub>21</sub>H<sub>24</sub>N<sub>2</sub>O<sub>4</sub>Na requires 391.1634.

### **(2*S*,3*S*)-2-(2-Hydroxyimino-3-methyl-butyrylamino)-3-methyl-pentanoic acid benzylester (2e)**

The title compound was prepared as described for **2a** using **1e** (0.94 g, 2.9 mmol) and, after flash chromatography (Silica gel, pentane-EtOAc 4:1), was obtained as a colourless oil (0.84 g, 2.5 mmol, 85%). *R<sub>f</sub>* 0.12 (CH<sub>2</sub>Cl<sub>2</sub>). [α]<sub>D</sub><sup>25</sup> +7.9° (*c* 3.40 in CHCl<sub>3</sub>). δ<sub>H</sub> (300MHz; CDCl<sub>3</sub>) 9.34 (1H, s, NOH), 7.39-7.16 (6H, m, CH<sub>ar</sub>, NH), 5.09 (2H, ABq, *J* 12.2, δ<sub>A</sub>-δ<sub>B</sub> 33.6, CH<sub>2</sub>-OBn), 4.62 (1H, dd, *J* 4.7 and 9.1, CH<sub>α</sub> Ile), 3.37 (1H, h, *J* 7.0, CH<sup>i</sup>Pr), 1.92-1.79 (1H, m, CH<sub>sBu</sub> Ile), 1.41-1.23 (1H, m, CHH Ile), 1.18 (3H, d, *J* 7.2, CH<sub>3</sub><sup>i</sup>Pr), 1.15 (3H, d, *J* 7.0, CH<sub>3</sub><sup>i</sup>Pr), 1.10-0.99 (1H, m, CHH Ile), 0.82 (3H, d, *J* 6.8, CH<sub>3</sub> Ile), 0.77 (3H, t, *J* 7.4, CH<sub>3</sub> Ile). δ<sub>C</sub> (75 MHz; CDCl<sub>3</sub>) 173.1, 164.2 (C=O), 158.6 (C=N), 135.2 (C<sub>ar</sub>), 128.7 (2 peaks), 128.5, 128.4 (CH<sub>ar</sub>), 67.5 (CH<sub>2</sub>-OBn), 56.5 (CH<sub>α</sub> Ile), 37.9 (CH<sub>sBu</sub> Ile), 25.6 (CH<sup>i</sup>Pr), 25.3 (CH<sub>2</sub> Ile), 18.7, 18.3 (CH<sub>3</sub><sup>i</sup>Pr), 15.7, 11.6 (CH<sub>3</sub> Ile). IR: 3334, 2966, 1739, 1662, 1516, 1192, 1003, 738, 698. LRMS (DCI) *m/z*: 335.1 (M+H)<sup>+</sup>, 351.7 (M+NH<sub>4</sub>)<sup>+</sup>. HRMS (ESI +) *m/z*: found, 357.1794; C<sub>18</sub>H<sub>26</sub>N<sub>2</sub>O<sub>4</sub>Na requires 357.1790.

## **Assignment of configuration for compounds 3**

### **Reduction of N–O bond for benzyl ester derivatives**

To a solution of *N*-hydroxy dipeptide **3a,d,e** (single diastereomer; 150 μmol) in THF (1 mL) was added a 0.1M solution of SmI<sub>2</sub> in THF<sup>4</sup> (3.8 mL). The mixture was stirred at room temperature for 1.5h. A saturated aqueous solution of Na<sub>2</sub>S<sub>2</sub>O<sub>3</sub> (10 mL) was added. The suspension was filtered over Celite® 535 and the filtrate dried over Na<sub>2</sub>SO<sub>4</sub>. Removal of the solvent under reduced pressure followed by purification by flash chromatography gave pure dipeptide H-AA<sub>1</sub>-AA<sub>2</sub>-OBn.

### **Reduction of N–O bond for ethyl ester derivatives**

A solution of *N*-hydroxy dipeptide **3b,c** (single diastereomer; 300 μmol) in EtOH (3 mL) was transferred over Raney Nickel.<sup>5</sup> The suspension was placed under an atmosphere of hydrogen and stirred at room temperature for 3h. The ethanolic solution was then pumped out. Removal of the solvent under reduced pressure followed by purification by flash chromatography gave pure dipeptide H-AA<sub>1</sub>-AA<sub>2</sub>-OEt.

### **Comparison with authentic (*S,S*)-H-AA<sub>1</sub>-AA<sub>2</sub>-OR samples**

Authentic (*S,S*) samples are prepared by DCC- or EDCI-mediated coupling of L-Fmoc-AA<sub>1</sub>-OH with L-H-AA<sub>2</sub>-OR followed by piperidine-induced cleavage of the Fmoc group.

Roughly equimolar amounts of authentic (*S,S*) dipeptide and unknown diastereomer were mixed in CDCl<sub>3</sub> and <sup>1</sup>H and <sup>13</sup>C NMR spectra were recorded. Matching (respectively mismatching) of the signals indicated the configuration of the diastereomer was (*S,S*) (respectively (*R,S*)).

## **References**

- 1 C. Fizet, *Helv. Chim. Acta*, 1982, **65**, 2024-2028.
- 2 Preparation of the α-keto acyl chloride was adapted from H. C. J. Ottenheijm and J. H. M. de Man, *Synthesis*, 1975, 163-164.
- 3 2-oxo-propanoyl chloride was prepared and isolated according to ref. 2.
- 4 Preparation of SmI<sub>2</sub>: D. P. Curran, W. Zhang and P. Dowd, *Tetrahedron*, 1997, **53**, 9023-9042.
- 5 Preparation of Raney Nickel: S. Sané, J.M. Bonnier, J.P. Damon and J. Masson, *Appl. Cat.*, 1989, **49**, 91.
